# Supplementary material for: The expression of pro-prion, a transmembrane isoform of the prion protein, leads to the constitutive activation of the canonical Wnt/β-catenin pathway to sustain the stem-like phenotype of human glioblastoma cells
Source: PubMed Central journal article supplement — Cancer Cell Int. 2024 Dec 23;24:426. doi: 10.1186/s12935-024-03581-1 (PMC11667964; doi:10.1186/s12935-024-03581-1), 2024-12-23
Supplement: 12935_2024_3581_MOESM1_ESM.pdf [file 12935_2024_3581_MOESM1_ESM.pdf]

## **ADDITIONAL FILES TO:**

**The expression of pro-prion, a transmembrane isoform of the prion protein, leads to the constitutive activation of the canonical Wnt/ $\beta$ -catenin pathway to sustain the stem-like phenotype of human glioblastoma cells**

Alessandro Corsaro<sup>1\*</sup>, Irene Dellacasagrande<sup>1\*</sup>, Michele Tomanelli<sup>2</sup>, Aldo Pagano<sup>2,3</sup>, Federica Barbieri<sup>1,3</sup>, Stefano Thellung<sup>1,3</sup>, and Tullio Florio<sup>1,3</sup>

*<sup>1</sup>Sezione di Farmacologia, Dipartimento di Medicina Interna, Università di Genova, Italy*

*<sup>2</sup>Dipartimento di Medicina Sperimentale, Università di Genova, Italy*

*<sup>3</sup>IRCCS Ospedale Policlinico San Martino, Genova, Italy*

Content:

Supplementary Tables 1-4

Supplementary Figures 1-8

**Table S1**

**Clinical and pathological features of patients, GBMs, and *in vivo* tumorigenicity of GBM-derived stem cells**

| <b>CODE</b>  | <b>SEX</b> | <b>AGE (years)</b> | <b>Ki-67 (%)</b> | <b>WHO grade</b> | <b>Status/<br/>Molecular subtype</b> | <b>LOCALIZATION</b>                                                         | <b><i>IN VIVO</i><br/>TUMORIGENESIS<br/>(NOD-SCID mice survival)</b> |
|--------------|------------|--------------------|------------------|------------------|--------------------------------------|-----------------------------------------------------------------------------|----------------------------------------------------------------------|
| <b>GBM 1</b> | F          | 40                 | 40               | IV               | Primary Neural                       | Multicentric                                                                | Yes (100 days)                                                       |
| <b>GBM 2</b> | M          | 48                 | 60%              | IV               | Primary Neural                       | Left hemisphere and sub-cortical development                                | Yes (120 days)                                                       |
| <b>GBM 3</b> | M          | 67                 | 35               | IV               | Primary Neural                       | Right hemisphere and cortical development                                   | Yes (55 days)                                                        |
| <b>GBM 4</b> | M          | 73                 | 40               | IV               | Primary Neural                       | Right hemisphere and sub-cortical development                               | Yes (150 days)                                                       |
| <b>GBM 5</b> | F          | 41                 | 30               | IV               | Secondary Mesenchymal                | Evolution from oligodendroglioma, right fronto-temporal, cortical diffusion | Yes (100 days)                                                       |

**Table S2**

**mRNA levels of stem and differentiation markers in GSC 1-5 cultures expressing different levels of PrP<sup>C</sup>.**

|              |     | <b>SOX 2</b>      | <b>NANOG</b>       | <b>OCT 4</b>       | <b>NESTIN</b>      | <b>GFAP</b>       |
|--------------|-----|-------------------|--------------------|--------------------|--------------------|-------------------|
| <b>GBM 1</b> | SCR | 100               | 100                | 100                | 100                | 100               |
|              | KO  | 41.3**            | 23**               | 39.6**             | 33.1**             | 305**             |
|              | OV  | 115 <sup>°</sup>  | 174 <sup>°</sup>   | 106                | 87.3 <sup>°</sup>  | 127 <sup>°</sup>  |
|              | REV | 102               | 223**              | 217*               | 90.7**             | 41.3**            |
| <b>GBM 2</b> | SCR | 100               | 100                | 100                | 100                | 100               |
|              | KO  | 51.1**            | 48.0**             | 72.2**             | 80.1**             | 159**             |
|              | OV  | 102 <sup>°</sup>  | 109 <sup>°</sup>   | 124 <sup>°</sup>   | 61.2 <sup>°</sup>  | 42.7 <sup>°</sup> |
|              | REV | 107               | 130**              | 159,4**            | 193**              | 64.4**            |
| <b>GBM 3</b> | SCR | 100               | 100                | 100                | 100                | 100               |
|              | KO  | 39.5**            | 10.1**             | 20.2**             | 20.0**             | 179**             |
|              | OV  | 100.5             | 300.9 <sup>°</sup> | 322 <sup>°</sup>   | 46.7 <sup>°</sup>  | 47 <sup>°</sup>   |
| <b>GBM 4</b> | SCR | 100               | 100                | 100                | 100                | 100               |
|              | KO  | 8.03**            | 28.1**             | 13.2**             | 13.2**             | 189**             |
|              | OV  | 106.9             | 258.1 <sup>°</sup> | 126.4 <sup>°</sup> | 70.2% <sup>°</sup> | 34.8 <sup>°</sup> |
| <b>GBM 5</b> | SCR | 100               | 100                | 100                | 100                | 100               |
|              | KO  | 11.2**            | 30.7**             | 23.5**             | 36.0**             | 194**             |
|              | OV  | 66.1 <sup>°</sup> | 89 <sup>°</sup>    | 135 <sup>°</sup>   | 51 <sup>°</sup>    | 89.0 <sup>°</sup> |

**Results are expressed as percentage of SCR cells, set as 100%; data represent the means ± SEM (n=4).**

**\* p < 0.05 and \*\*p < 0.01 vs. respective GBM SCR cells**

**<sup>°</sup> p < 0.05 and <sup>°°</sup>p < 0.01 vs. respective GBM KO cells**

**Table S3**

**Primary and secondary antibodies used in the study**

| <b>PRIMARY ANTIBODIES</b>                                                                                                     |
|-------------------------------------------------------------------------------------------------------------------------------|
| • anti-PrP: clones 3F4 (mouse) (Signet Lab) and Saf 32 (mouse) (SPIbio), dil. 1:5000 (Wb ,IF)                                 |
| • anti- $\beta$ -actin (mouse) (Sigma-Aldrich), dil. 1:1000 (Wb)                                                              |
| • anti- $\alpha$ -tubulin (rabbit) (Cell Signaling Technology), dil. 1:1000 (Wb )                                             |
| • anti-GFAP (rabbit) (Cell Signaling Technology), dil. 1:1000 (Wb)                                                            |
| • anti-NANOG (rabbit) (Abcam), dil. 1:1000 (Wb)                                                                               |
| • anti-Oct4 (rabbit) (Cell Signaling Technology), dil. 1:1000 (Wb)                                                            |
| • anti-Sox2 (rabbit) (Cell Signaling Technology), dil. 1:1000 (Wb)                                                            |
| • anti-CD44 (rabbit) (Abcam), dil. 1:1000 (Wb)                                                                                |
| • anti- $\beta$ -catenin (rabbit) (Cell Signaling Technology), dil. 1:1000 (Wb)                                               |
| • anti-Dvl2 (rabbit) (Cell Signaling Technology), dil. 1:1000 (Wb )                                                           |
| • anti-Axin2 (rabbit) (Cell Signaling Technology), dil. 1:1000 (Wb).....                                                      |
| • anti-Wnt5a/b (rabbit) (Cell Signaling Technology), dil. 1:1000 (Wb )                                                        |
| <b>SECONDARY ANTIBODIES:</b>                                                                                                  |
| • Horseradish peroxidase-linked anti-mouse and anti-rabbit IgG antiserum (GE Healthcare), dil. 1:5000, used in Western blots. |
| • AlexaFluor 488-conjugated anti-rabbit secondary Ab (Molecular Probes), dil. 1:5000, used in immunofluorescence.             |

**Table S4****Sequences of the primers used in qRT-PCR amplifications**

|               | <b>FORWARD</b>                   | <b>REVERSE</b>                |
|---------------|----------------------------------|-------------------------------|
| <b>RPLP0</b>  | 5'-TGTGGGCTCCAAGCAGATGCA-3'      | 5'-GCAGCAGTTTCTCCAGAGCTGGG-3' |
| <b>28S</b>    | 5'-CCCAGTGCTCTGAATGTCAA-3'       | 5'-AGTGGGAATCTCGTTCATCC-3'    |
| <b>PRNP</b>   | 5'-AGTGGAACAAGCCGAGTAAGC-3'      | 5'-GTCAGTCCGAAATGTATGATG-3'   |
| <b>SOX-2</b>  | 5'-CAGGAGTTGTCAAGGCAGAGA-3'      | 5'-TCCTAGTCTTAAAGAGGCAGCA-3'  |
| <b>NANOG</b>  | 5'-GTCCCAAAGGCAAACAACCC-3'       | 5'-TGACCGGGACCTTGTCTTC-3'     |
| <b>NESTIN</b> | 5'-TGGCTCAGAGGAAGAGTCTGA-3'      | 5'-TCCCCCATTCACATGCTGTGA-3'   |
| <b>OCT-4</b>  | 5'-CTTCGCAAGCCCTCATTTAC-3'       | 5'-GAAGGCGAAATCCGAAGCCA-3'    |
| <b>GFAP</b>   | 5'-TCCTGGAACAGCAAAACAAG-3'       | 5'-CAGCCTCAGGTTGGTTTCAT-3'    |
| <b>CD44</b>   | 5'-TGAATATAACCTGCCGCTTTG-3'      | 5'-GCTTTCTCCATCTGGGCCAT-3'    |
| <b>WNT 3A</b> | 5'-CATGAACCGCCACAACAAC-3'        | 5'-TGGCACTTGCACTTGAGGT-3'     |
| <b>WNT 5A</b> | 5'-ATTGTAAGTGCAGGTGTACCTTAAAC-3' | 5'-CCCCCTTAGGCAGGTTGGC-3'     |
| <b>WNT 7A</b> | 5'-CTTCGGGAAGGAGCTCAA-3'         | 5'-GCAATGATGGCGTAGGTGA-3'     |
| <b>WNT 7B</b> | 5'-CGCCTCATGAACCTGCATA-3'        | 5'-GCTGCATCCGGTCCTCTA-3'      |
| <b>FZD 1</b>  | 5'-CGGCAAGACCCTCAACTC-3'         | 5'-CCTTGTTTGCTGTTGGTGAG-3'    |
| <b>FZD 3</b>  | 5'-ACAGCAAAGTGAGCAGCTACC-3'      | 5'-CTGTAAGTGCAGGGCGTGTA-3'    |
| <b>FZD 4</b>  | 5'-TTCACACCGCTCATCCAGTA-3'       | 5'-TGCACATTGGCACATAAACA-3'    |

**Figure S1**

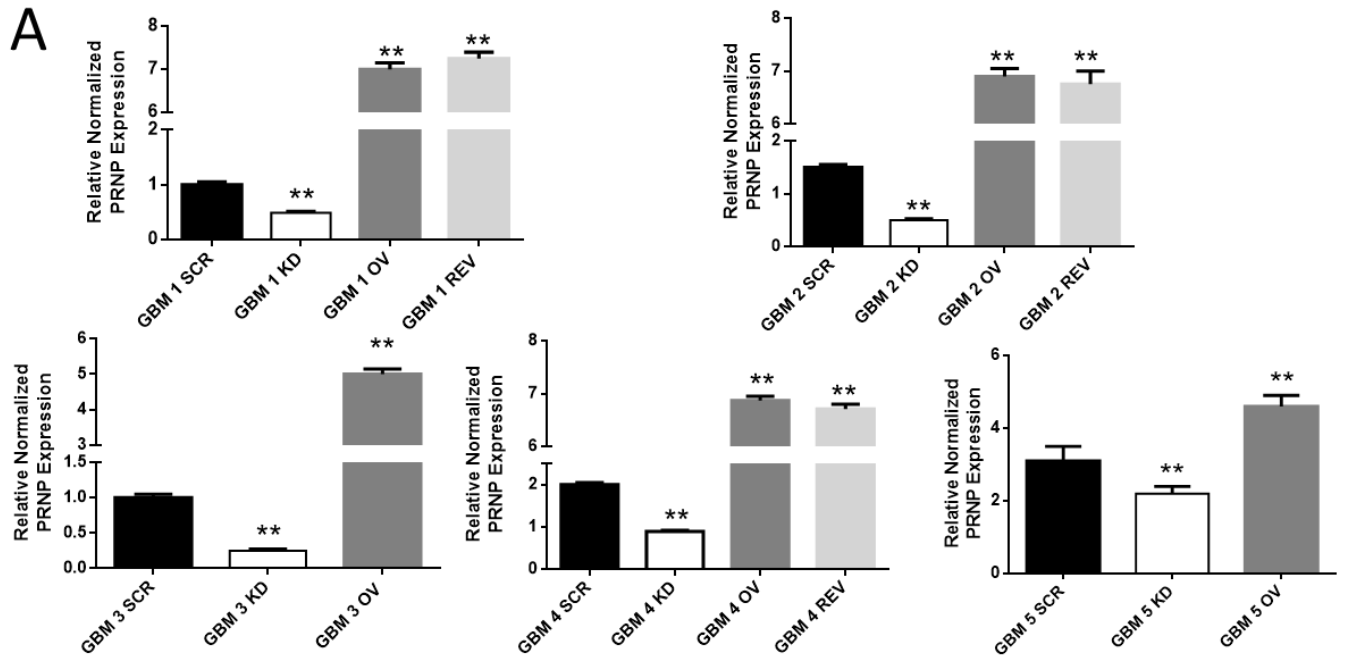

**B**

|       | SCR (%) | KD (%)  | OV (%)  | REV (%) |
|-------|---------|---------|---------|---------|
| GBM 1 | 100     | 36.36** | 909**   | 1080**  |
| GBM 2 | 100     | 46.6**  | 666.2** | 450**   |
| GBM 3 | 100     | 62.3**  | 763.9** |         |
| GBM 4 | 100     | 18.1**  | 679**   | 634**   |
| GBM 5 | 100     | 64**    | 123**   |         |

**PrP<sup>C</sup> mRNA expression in transfected GSCs**

A) Normalized PrP<sup>C</sup> mRNA levels in GBM 1-5 SCR, KO, OV, and REV evaluated by RT-qPCR. Results are expressed as means  $\pm$  SEM (n=3). \*\*p < 0.01 vs. respective GBM SCR cells (t-test).

B) Summary of PrP<sup>C</sup> mRNA levels, represented as percentage versus respective GBM SCR cells. Results are as the mean  $\pm$  SEM (n=3). \*\*p < 0.01 vs. respective GBM SCR (t-test).

**Figure S2**

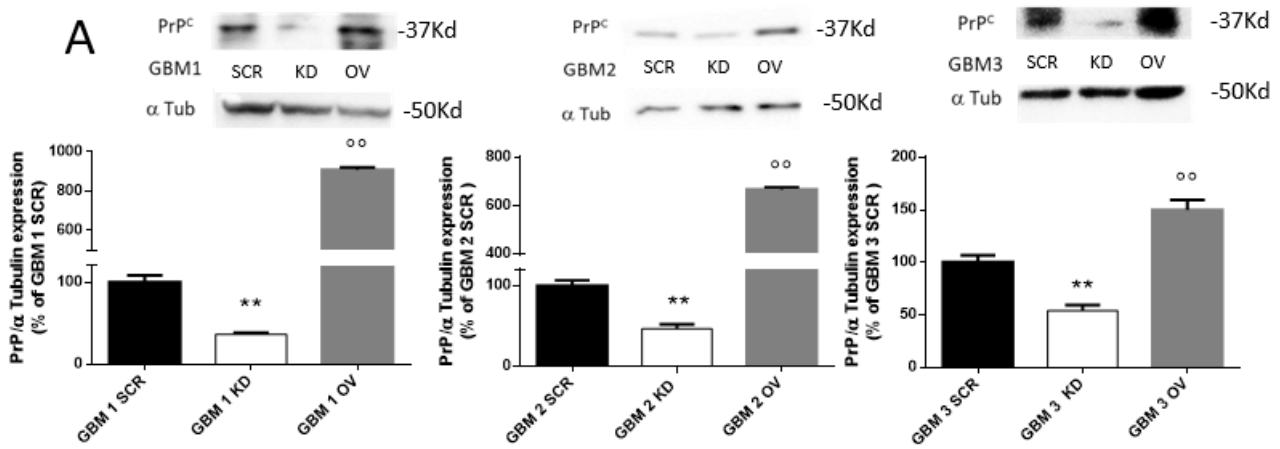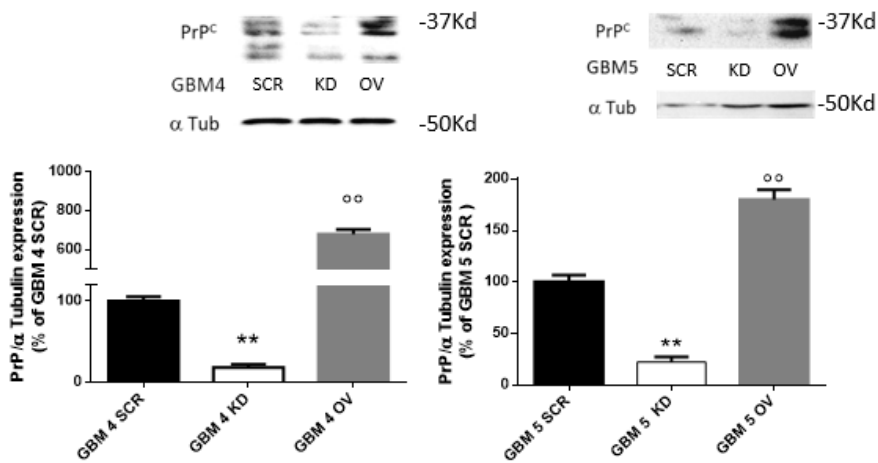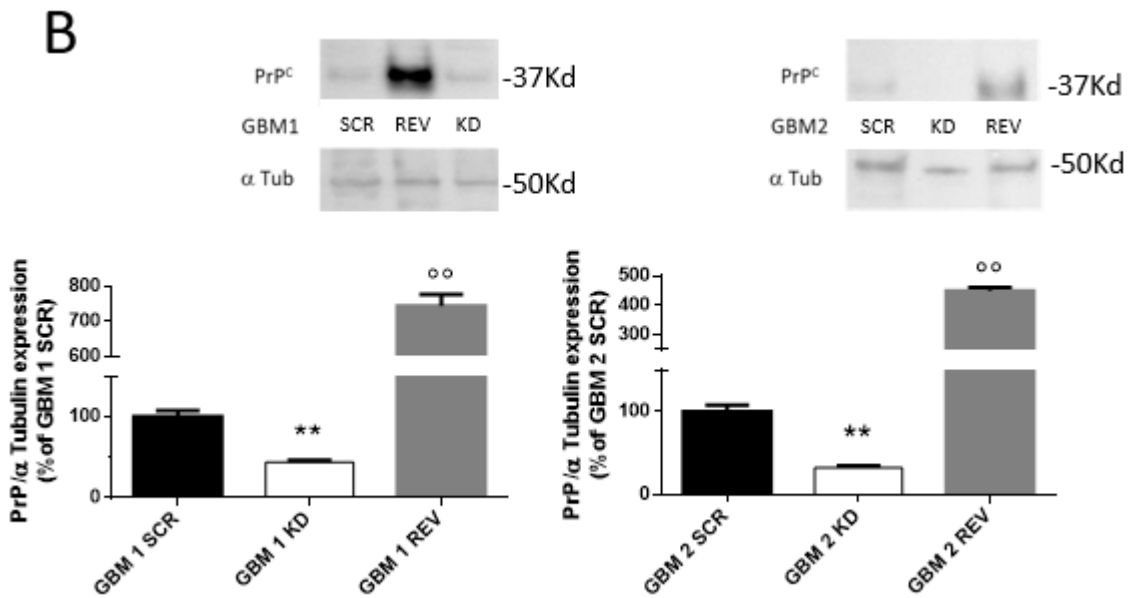

C

|       | <b>SCR (%)</b> | <b>KD (%)</b> | <b>OV (%)</b> | <b>REV (%)</b> |
|-------|----------------|---------------|---------------|----------------|
| GBM 1 | 100            | 45**          | 950**         | 1191**         |
| GBM 2 | 100            | 32**          | 543**         | 433**          |
| GBM 3 | 100            | 42**          | 580**         |                |
| GBM 4 | 100            | 16**          | 230**         |                |
| GBM 5 | 100            | 35**          | 170**         |                |

### **PrP<sup>C</sup> protein expression in transfected GSCs**

A) Immunoblots of PrP<sup>C</sup> protein in GBM 1-5 SCR, KD, and OV.

B) Immunoblots of PrP<sup>C</sup> protein in GBM1-2 SCR, KD, and REV.

PrP<sup>C</sup> content was determined by 3F4 immunoreactivity by densitometric analysis, normalized to  $\alpha$ -tubulin, and reported percentage of GBM SCR cells. Results are expressed as means  $\pm$  SEM (n=3) \*\*p < 0.01 vs respective GBM SCR, °° p < 0.01 vs respective GBM KO. (ANOVA, Tukey's post-test)

C) Summary of PrP<sup>C</sup> levels, represented as percentage of respective GBM SCR cells. Each value is the mean  $\pm$  SEM (n=3) and expressed as percentage of GBM SCR. \*\*p<0.01 vs. respective GBM SCR cells (t-test).



**Figure S3**

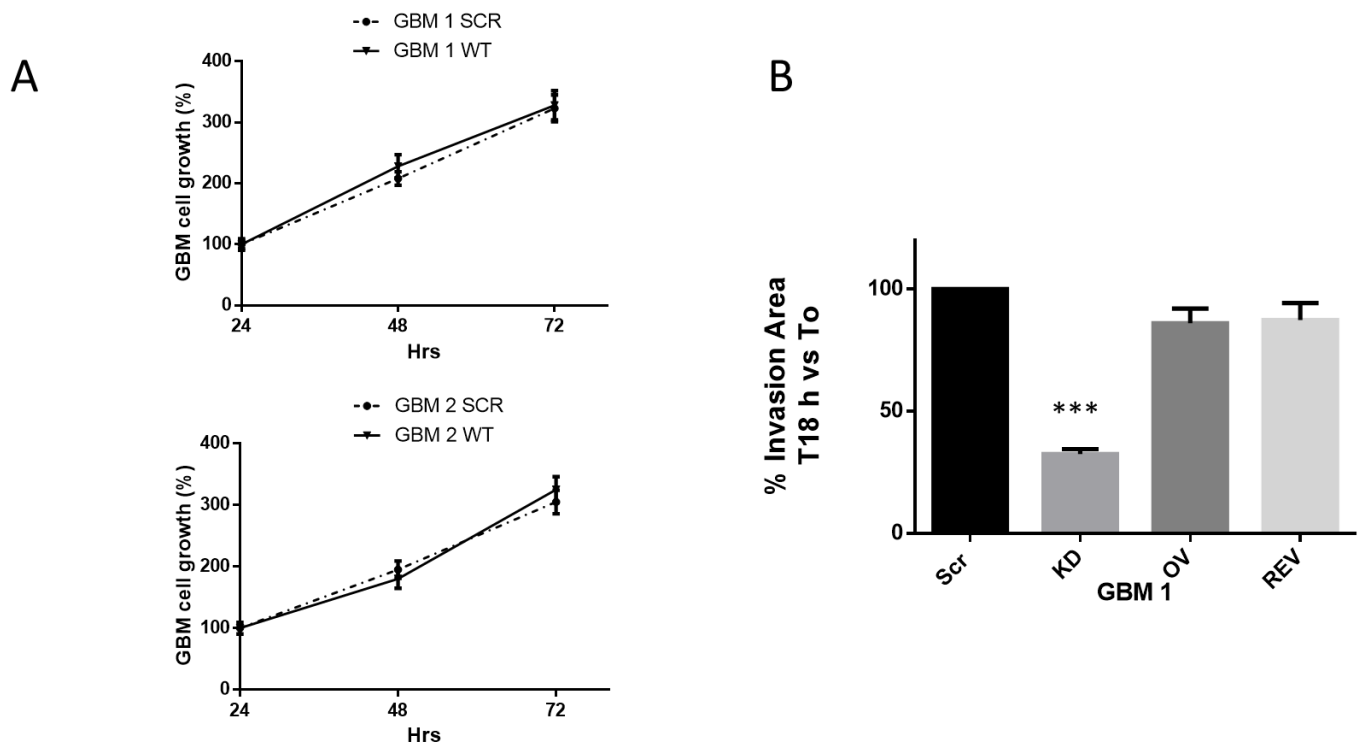

A) Comparison of cell proliferation rate between GSC wild-type (WT) and SCR. Growth curves of GBM 1 and GBM 2 WT and respective SCR cells were obtained by MTT assay after 24, 48, and 72 hrs in culture. Each point reports the mean  $\pm$  SD (n=8).  
B) Quantification of Matrigel invasion by GBM 1 SCR, KD, OV, and REV cultures. \*\*\* $p < 0.001$ , vs. GBM SCR, OV AND REV (ANOVA, Tukey's post-test).

**Figure S4**

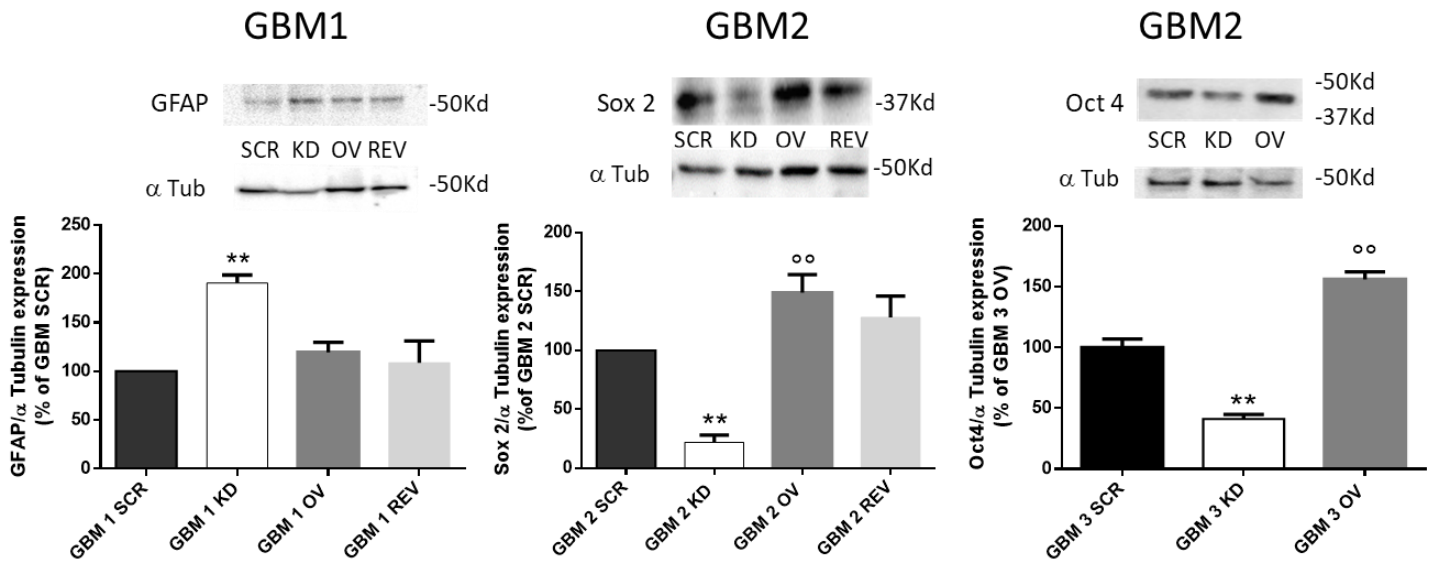

**Expression of differentiation and stemness marker in GSCs upon modulation of PrP<sup>C</sup> expression**

Representative immunoblots of proteins GFAP, Sox 2, and Oct-4 proteins in GSCs. Quantification of protein levels by densitometric analysis, were normalized to  $\alpha$ -tubulin, is reported as percentage of GBM SCR. Results are expressed as mean  $\pm$  SEM (n=3) \*\*p<0.01, <sup>oo</sup>p<0.01 vs. respective GBM SCR (ANOVA, Tukey's post-test).

Figure S5

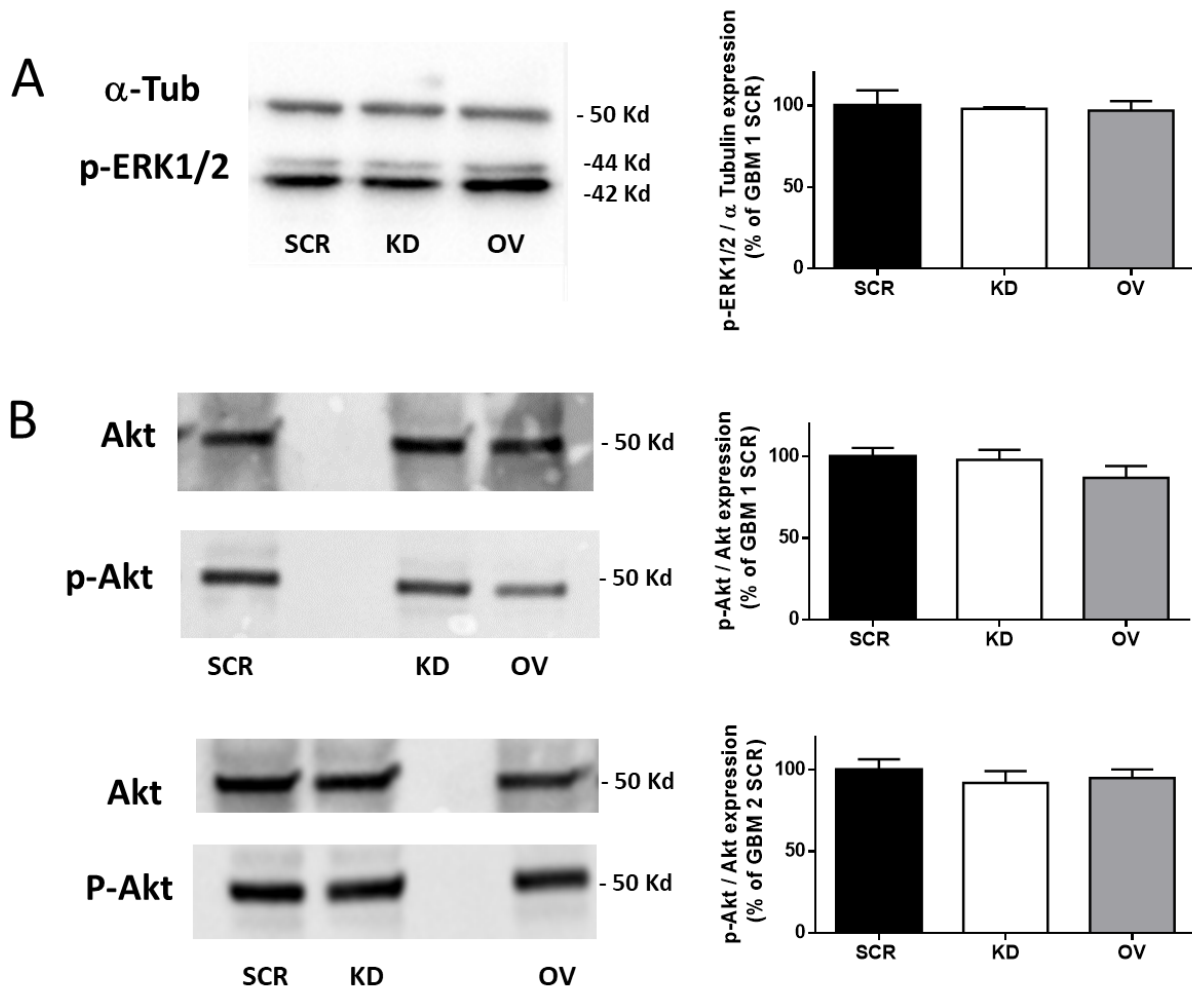

**Downregulation of PrP<sup>C</sup> does not influence amount of p-ERK1/2 or p-AKT**

A) Representative immunoblot showing the amount of p-ERK1/2 protein in in GBM1 SCR, KD, and OV (left). Quantification of p-ERK1/2 amount normalized for  $\alpha$ -Tubulin content (right). Bars represent the mean  $\pm$  SD (n=3).

B) Representative immunoblot showing the content of p-AKT protein in GBM1, 2 SCR, KD, and OV (left). Quantification of p-AKT amount normalized for AKT content (right). Bars represent the mean  $\pm$  SD (n=3).

**Figure S6**

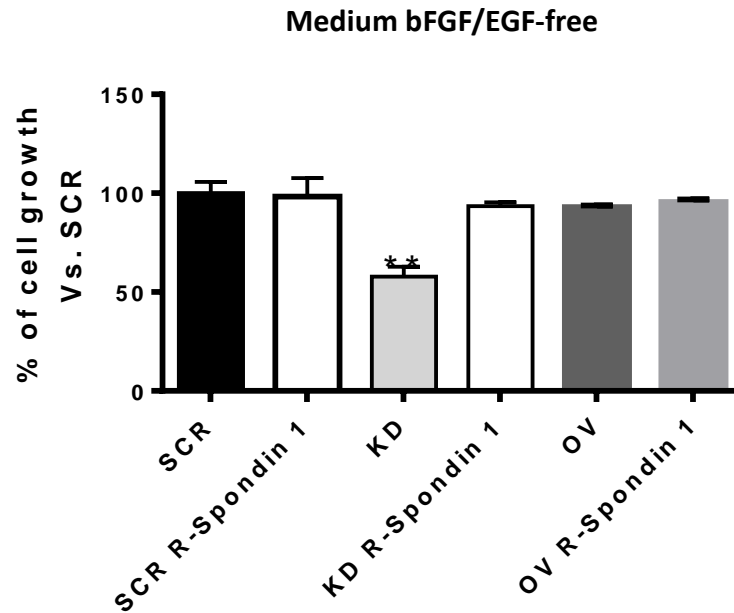

**The absence of bFGF/EGF does not influence R-Spondin1-dependent recover of proliferation rate in GBM KD cells.**

A) Cell proliferation of GBM 2 SCR, KD, and OV, after 48 hrs of treatment with R-Spondin1 (500 ng/ml), measured by MTT assay. Bars represent the mean  $\pm$  SD (n=3) \*\*p<0.01 (t-test).

**Figure S7**

## PERMEABILIZED ASTROCYTES

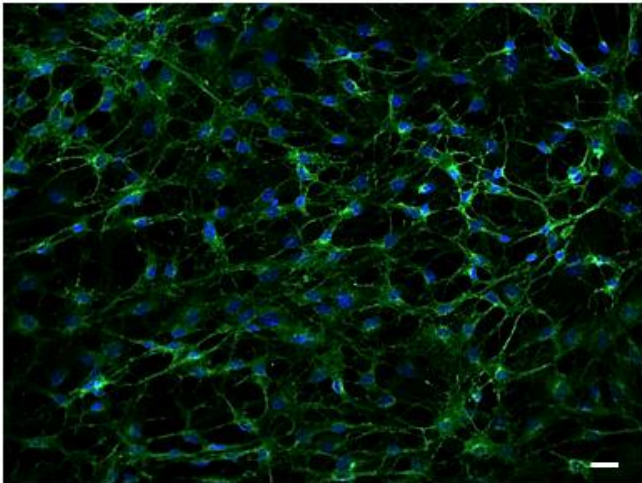

Untreated

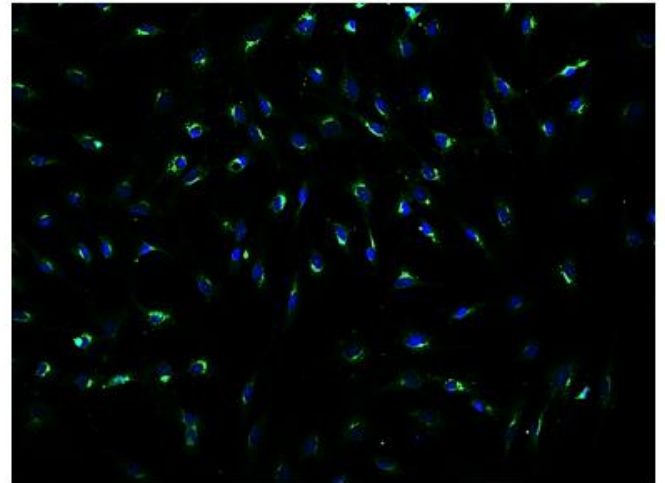

Pi-PLC

### **PrP<sup>C</sup> expression in astrocytes**

Representative images of PrP<sup>C</sup> immunofluorescence (green) obtained with the anti-PrP<sup>C</sup> antibody SAF 32 in astrocytes, in control conditions (untreated) and after treatment with 1U/ml Pi-PLC at 37 °C for 30 min. After fixation, astrocytes have been permeabilized to evidence intracellular PrP<sup>C</sup> immunoreactivity. Nuclei were counterstained with DAPI (blue). Scale bar = 100µM

Figure S8

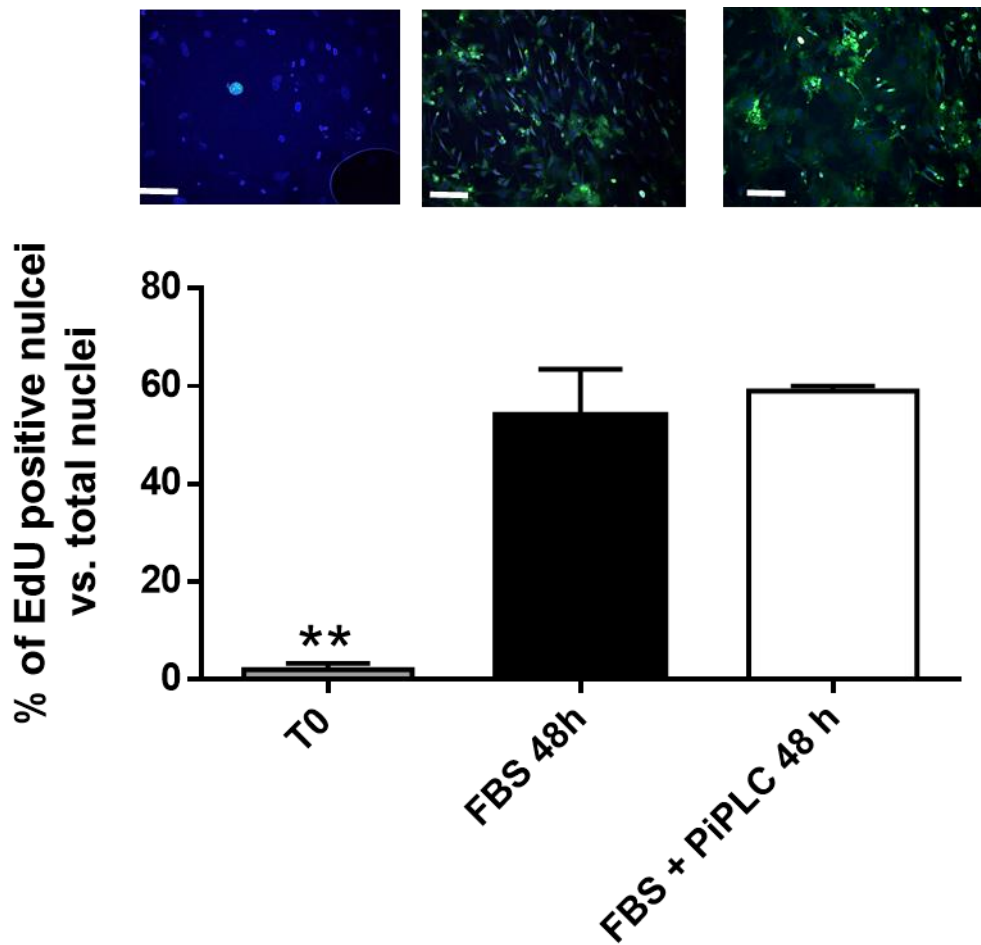

**Pi-PLC treatment does not affect astrocytes proliferation**

A) Representative images of proliferating astrocytes (green) in absence or presence of Pi-PLC treatment, assessed by EdU-incorporation. Scale bar =200  $\mu$ m.

B) Histograms show the percentage of labelled (proliferating) cells obtained by ImageJ analysis of 7 microscopy fields for each replica experiment (n=3). Bars represent the mean  $\pm$  SD.
